# Supplementary material for: Two Cu(i) coordination polymers based on a new benzimidazolyl-tetrazolyl heterotopic ligand for visible-light-driven photocatalytic dye degradation
Source: Royal Society of Chemistry journal article supplement (doi:10.1039/d2ce01497a), 2022-12-06
Supplement: d2ce01497a1.pdf [file d2ce01497a1.pdf]

## Two Cu(I) coordination polymers based on a new benzimidazolyl-tetrazolyl heterotopic ligand for visible-light-driven photocatalytic dye degradation

Ping Tang,<sup>a, ‡</sup> Xue-Xian Xie,<sup>a, ‡</sup> Zi-Yuan Huang,<sup>a</sup> Zhi-Yang Kuang,<sup>a</sup> Song-Liang Cai,<sup>a</sup> Wei-Guang Zhang,<sup>a,b,\*</sup> Sheng-Run Zheng<sup>a,\*</sup>

<sup>a</sup>School of Chemistry, Guangzhou Key Laboratory of Analytical Chemistry for Biomedicine, South China Normal University, Guangzhou, 510006, P. R. China.

<sup>b</sup>GDMPA Key Laboratory for Process Control and Quality Evaluation of Chiral Pharmaceuticals, South China Normal University, Guangzhou 510006, China.

<sup>‡</sup>These authors are contributed equally to the work.

\* Corresponding author: Prof. Sheng-Run, Zheng; Prof. Wei-Guang Zhang

E-mail address: [zhengsr@scnu.edu.cn](mailto:zhengsr@scnu.edu.cn); [wgzhang@scnu.edu.cn](mailto:wgzhang@scnu.edu.cn)

Tel./Fax.: +86-20-39310187

### Supporting Information

**Table S1** Crystallographic data and structure refinement summary for CPs 1-2

| Complex                                        | CP 1                                               | CP 2                                               |
|------------------------------------------------|----------------------------------------------------|----------------------------------------------------|
| Empirical formula                              | C <sub>21</sub> H <sub>15</sub> CuN <sub>8</sub> O | C <sub>24</sub> H <sub>20</sub> CuN <sub>9</sub> O |
| Formula weight                                 | 458.95                                             | 514.03                                             |
| Crystal system                                 | Monoclinic                                         | Monoclinic                                         |
| Space group                                    | <i>P</i> 21/ <i>c</i>                              | <i>P</i> 21/ <i>n</i>                              |
| <i>a</i> / Å                                   | 15.5585(2)                                         | 10.6532(5)                                         |
| <i>b</i> / Å                                   | 16.1849(3)                                         | 16.4768(8)                                         |
| <i>c</i> / Å                                   | 7.67250(10)                                        | 13.9291(7)                                         |
| $\alpha$ / °                                   | 90                                                 | 90                                                 |
| $\beta$ / °                                    | 100.337(2)                                         | 102.397(2)                                         |
| $\gamma$ / °                                   | 90                                                 | 90                                                 |
| <i>V</i> / Å <sup>3</sup>                      | 1900.68(5)                                         | 2388.0(2)                                          |
| <i>Z</i>                                       | 4                                                  | 4                                                  |
| <i>D</i> / g cm <sup>-3</sup>                  | 1.604                                              | 1.430                                              |
| $\mu$ / mm <sup>-1</sup>                       | 1.906                                              | 0.951                                              |
| <i>T</i> / K                                   | 293(2)                                             | 293(2)                                             |
| <i>R</i> <sup>a</sup> / <i>wR</i> <sup>b</sup> | 0.0333 / 0.0954                                    | 0.0627 / 0.1575                                    |
| Total / unique                                 | 10388 / 3626                                       | 37660 / 5534                                       |

<sup>a</sup>  $R_1 = \sum ||F_o| - |F_c|| / \sum |F_o|$ , <sup>b</sup>  $wR_2 = [\sum w(F_o^2 - F_c^2)^2 / \sum w(F_o^2)^2]^{1/2}$ , where  $w = 1 / [\sigma^2(F_o^2) + (aP)_2 + bP]$ .  $P = (F_o^2 + 2F_c^2) / 3$ .

**Table S2** Selected bond lengths [ $\text{\AA}$ ] and angles [ $^\circ$ ] for CPs 1-2

| CP 1                |            |                     |            |
|---------------------|------------|---------------------|------------|
| Cu(1)-N(1)          | 1.9644(17) | N(1)-Cu(1)-N(8)#1   | 133.67(7)  |
| Cu(1)-N(8)#1        | 1.9757(17) | N(1)-Cu(1)-N(2)#2   | 113.22(7)  |
| Cu(1)-N(2)#2        | 2.0204(18) | N(8)#1-Cu(1)-N(2)#2 | 112.34(7)  |
| C(21)-N(8)-C(20)    | 105.20(16) | C(20)-N(8)-Cu(1)#3  | 131.78(13) |
| C(21)-N(8)-Cu(1)#3  | 122.85(14) |                     |            |
| CP 1                |            |                     |            |
| Cu(1)-N(5)#1        | 1.983(3)   | Cu(1)-N(3)          | 2.085(3)   |
| Cu(1)-N(1)#2        | 2.021(3)   | Cu(1)-N(6)#3        | 2.144(3)   |
| N(5)#1-Cu(1)-N(1)#2 | 127.21(12) | N(5)#1-Cu(1)-N(6)#3 | 113.48(11) |
| N(5)#1-Cu(1)-N(3)   | 108.73(12) | N(1)#2-Cu(1)-N(6)#3 | 100.64(12) |
| N(1)#2-Cu(1)-N(3)   | 108.22(13) | N(3)-Cu(1)-N(6)#3   | 93.12(12)  |

Symmetry transformations used to generate equivalent atoms: #1  $x, -y + 1/2, z + 1/2$ , #2  $-x + 1, -y + 1, -z + 2$ , #3  $x, -y + 1/2, z - 1/2$  for CP 1; #1  $-x, -y, -z$ , #2  $x + 1/2, -y + 1/2, z + 1/2$ , #3  $x + 1, y, z$ , #4  $x - 1, y, z$ , #5  $x - 1/2, -y + 1/2, z - 1/2$  CP 2.

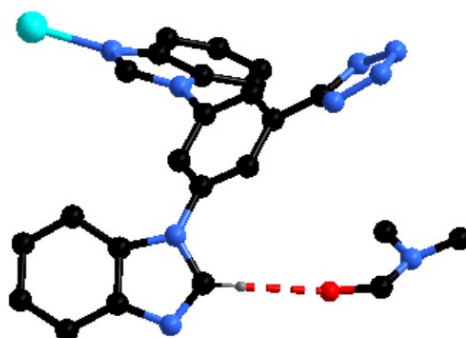**Fig. S1** The hydrogen bond between DMF and the framework in CP 2.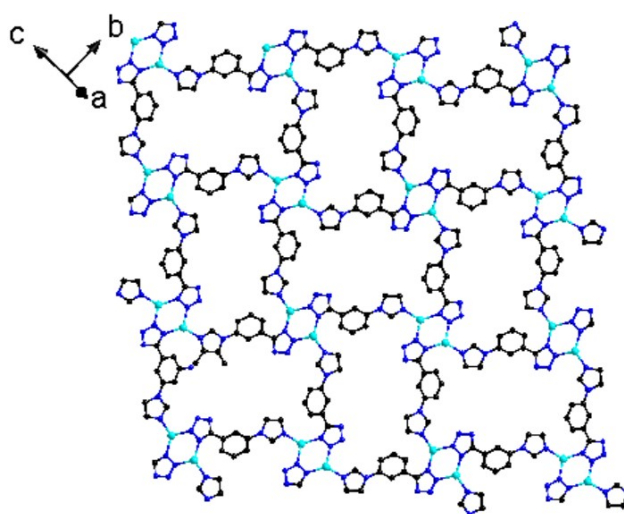**Fig. S2** The 2D layer in CP 2.

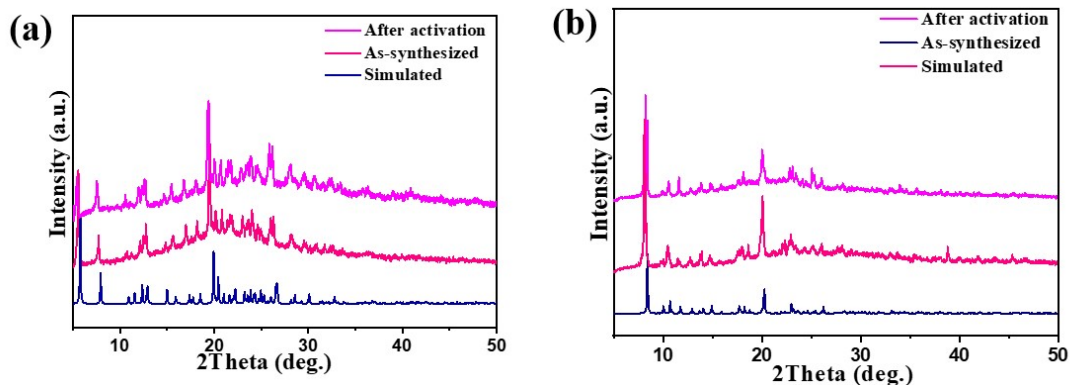

**Fig. S3** PXRD of (a) Simulated and as-synthesized CP 1 and (b) Simulated and as-synthesized CP 2.

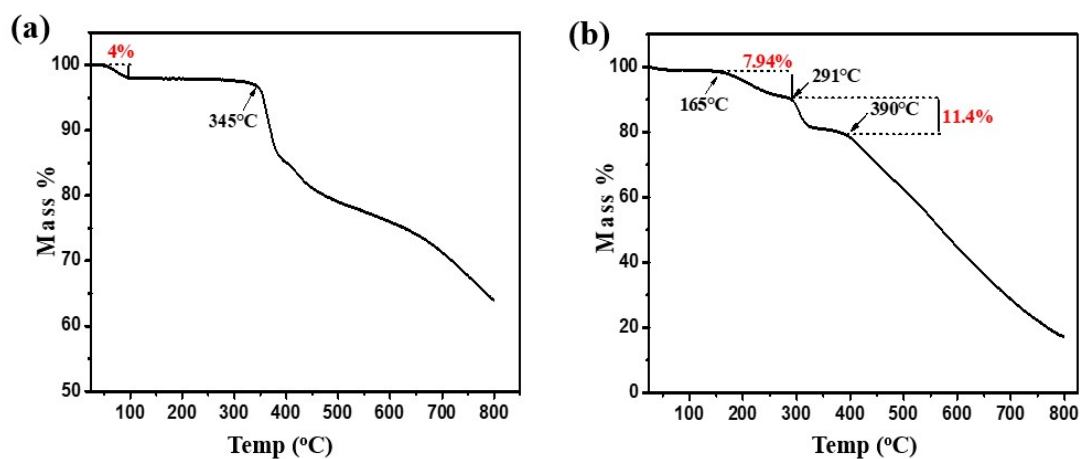

**Fig. S4** TG curve of (a) CP 1 and (b) CP 2.

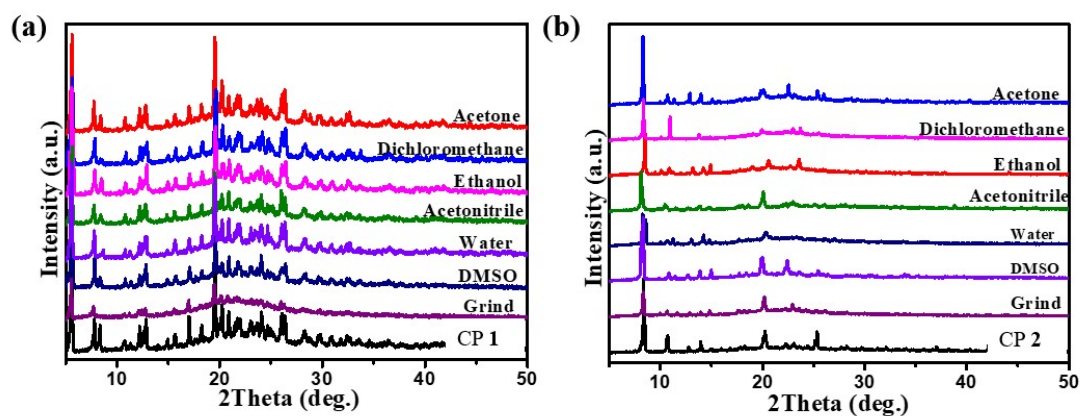

**Fig. S5** PXRD of (a) CP 1 and (b) CP 2 after immersing in different organic solvents for 72 h.

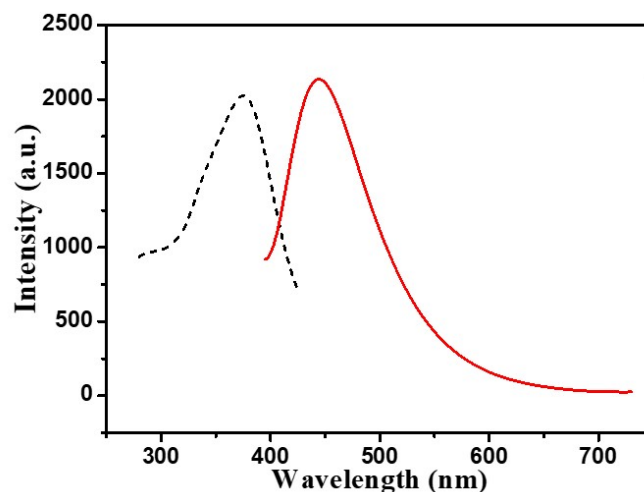

**Fig. S6** Photoluminescence spectrum of HDBPT.

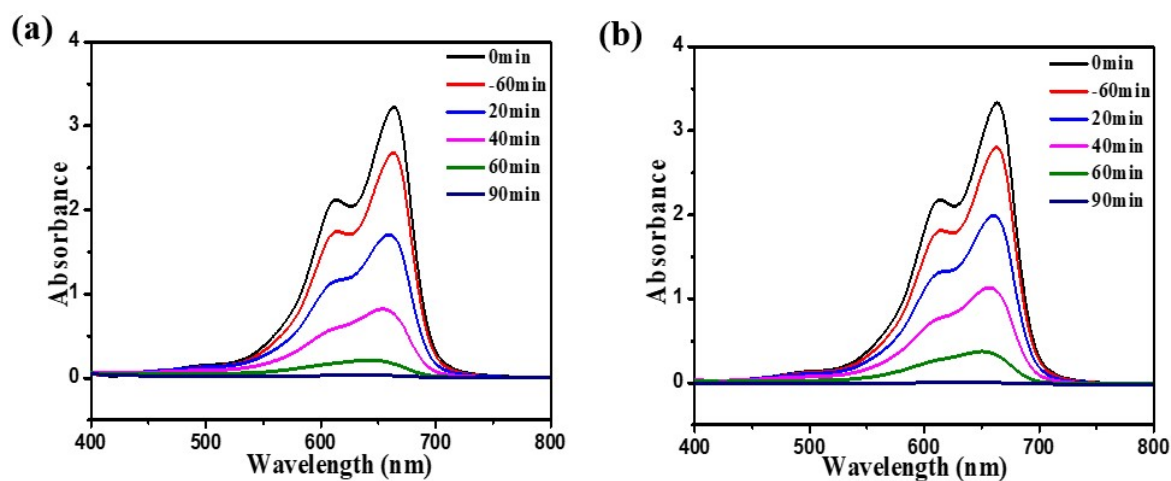

**Fig. S7** UV-vis spectra of MLB solutions which were recorded after photocatalytic degradation had been performed for different lengths of time with (a) CP 1 and (b) CP 2 in the presence of  $\text{H}_2\text{O}_2$ .

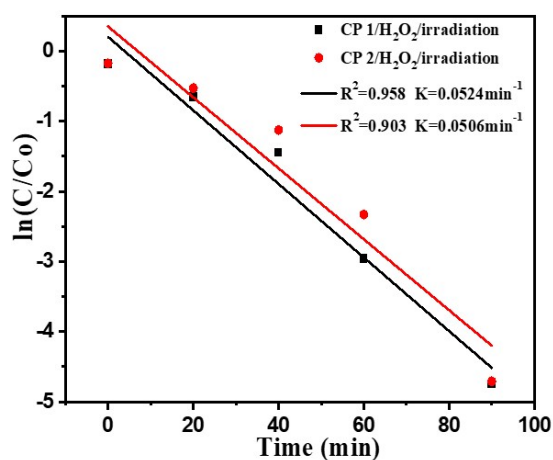

**Fig. S8** Pseudo-first-order plot with respect to time for CP 1 and CP 2 in an aqueous MLB solution.

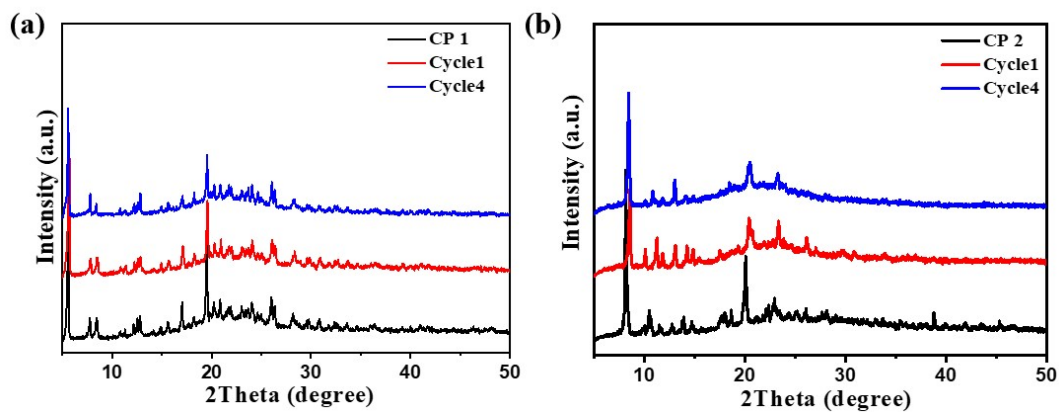

**Fig. S9** The PXRD patterns of (a) CP 1 and (b) CP 2 before and after recycling test for MLB.

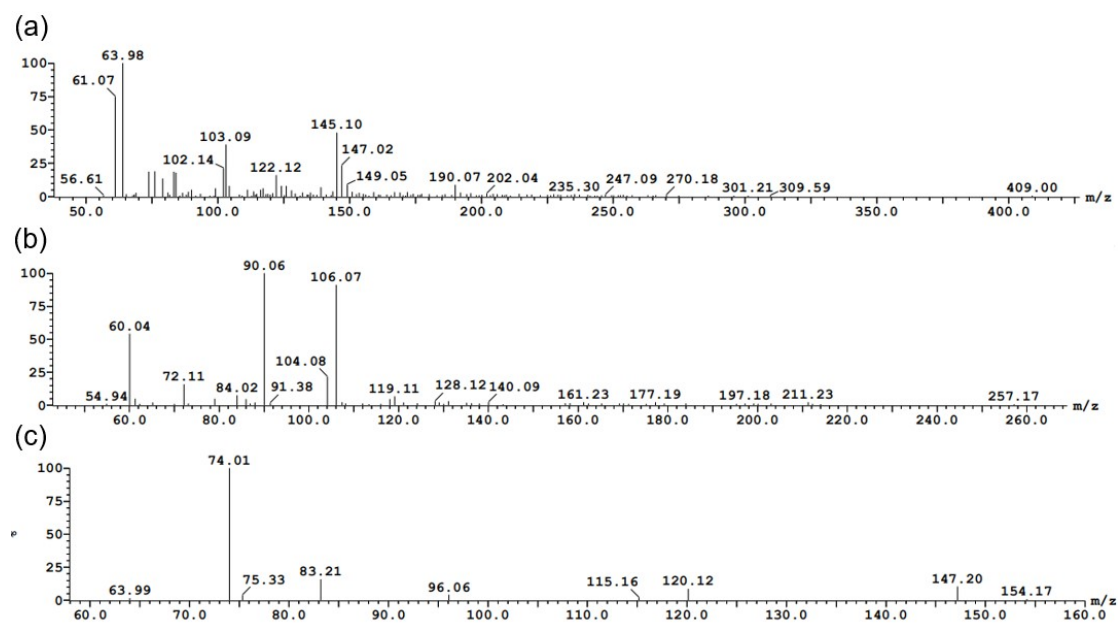

**Fig. S10** The ESI positive mass spectra of MLB after reacting for 90 min by using CP 1 as catalyst.

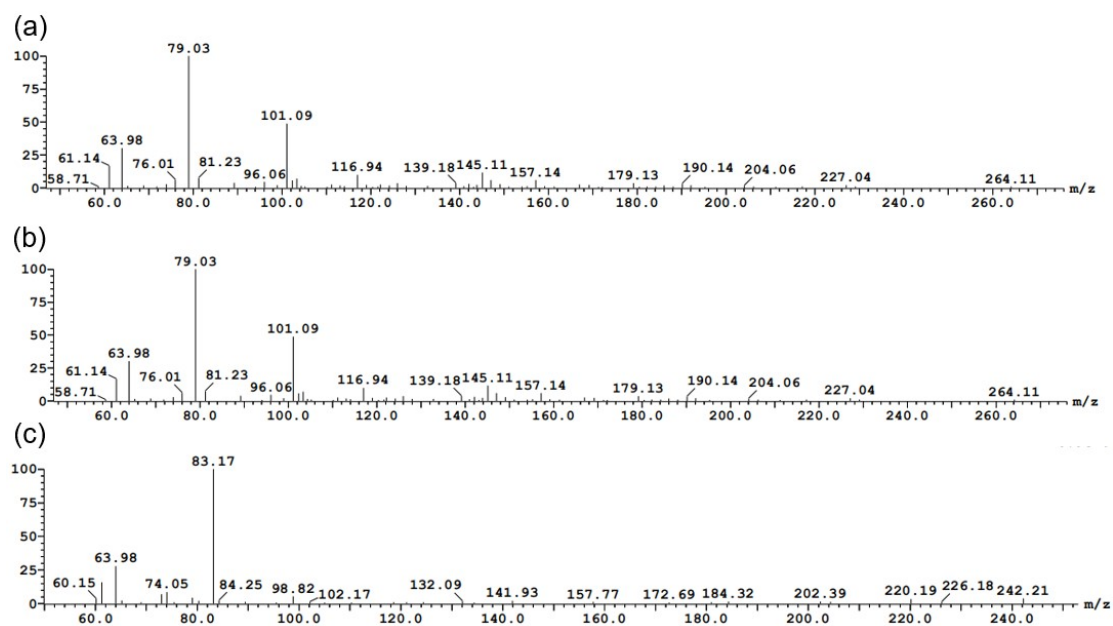

**Fig. S11** The ESI positive mass spectra of MLB after reacting for 90 min by using CP 2 as catalyst.
